# Supplementary material for: Towards selective electrochemical conversion of glycerol to 1,3-propanediol
Source: Royal Society of Chemistry journal article supplement (doi:10.1039/c8ra00711j), 2018-01-01
Supplement: c8ra00711j1.pdf [file c8ra00711j1.pdf]

## Supplementary information

### Towards selective electrochemical conversion of glycerol to 1,3-Propanediol

Olusola O. James,<sup>1,2</sup> Waldemar Sauter,<sup>1</sup> Uwe Schröder<sup>1</sup>

<sup>1</sup> Institute of Environmental and Sustainable Chemistry, Technical University, Braunschweig, Hangenring 30, 38106, Braunschweig, Germany

<sup>2</sup>Chemistry Unit, Kwara State University, Malete, P.M.B. 1530, Ilorin, Nigeria

| Cathode | Mass (g) before electrolysis | Mass(g) after electrolysis | % Mass difference |
|---------|------------------------------|----------------------------|-------------------|
| Pb      | 9.04190                      | 9.0557                     | + 0.15 %          |
| Zn      | 3.60605                      | 3.3248                     | - 7.8%            |

Table S1a: Masses of Zn and Pb as working electrode before and after electrolysis 0.25M Glycerol in an undivided cell with Ti-RuO<sub>2</sub> counter electrode in 0.5M HCl solution (potential -1.8V Sat'd AgCl/Cl, temperature 25 °C)

| Cathode | Conc (mg/L) | Conc (mg/L) |
|---------|-------------|-------------|
| Pb      | 0.029       | 406         |
| Zn      | 0.045       | 6630        |

Table S1b: ICP-OES analysis of the cell content before and after electrolysis reaction

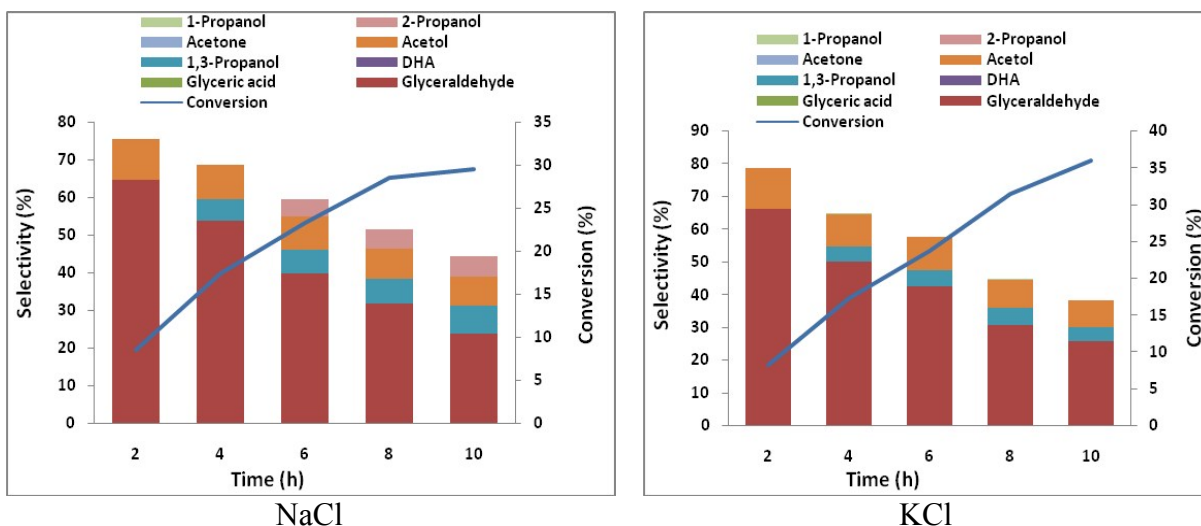

Figure S2: Conversion and selectivity of oxidation of 0.25M Glycerol in a undivided cell using Pb working electrode and Ti-RuO<sub>2</sub> counter electrode in using 0.5M chloride solutions acidified with HCl to pH 1 (potential -1.8V Saturated AgCl/Cl, temperature 25 °C)

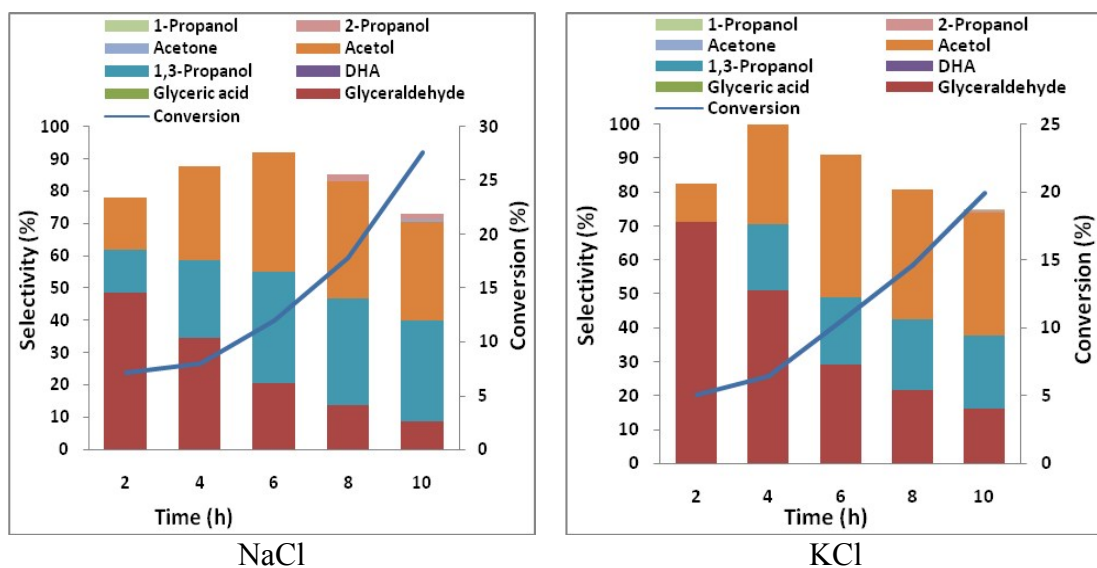

Figure S3: Conversion and selectivity of oxidation of 0.25M Glycerol in a undivided cell using Zn working electrode and Ti-RuO<sub>2</sub> counter electrode in using 0.5M chloride solutions acidified with HCl to pH 1 (potential -1.8V Saturated AgCl/Cl, temperature 25 °C)

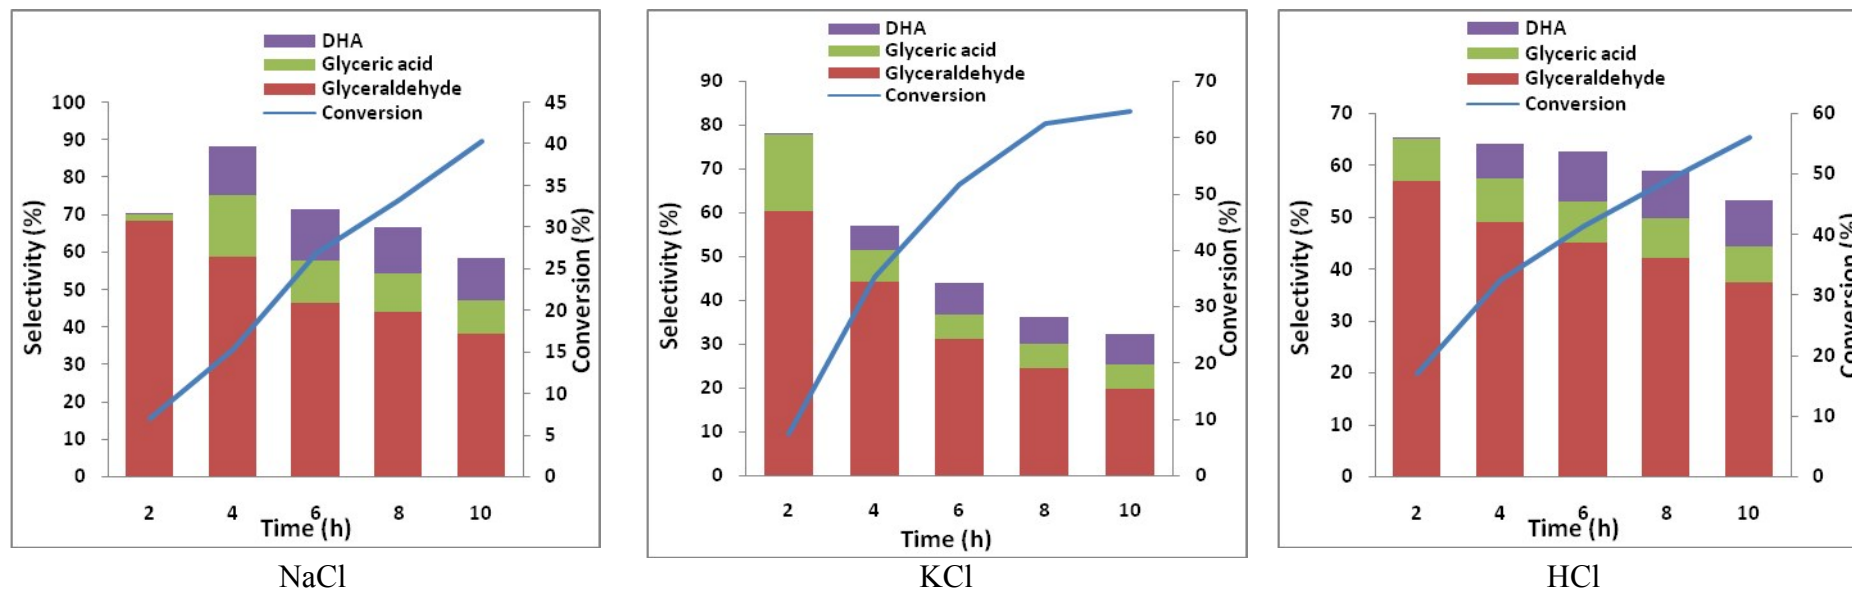

Figure S4: Conversion and selectivity of oxidation of 0.25M Glycerol in a divided cell using Pt working electrode and Pt counter electrode in using 0.5M chloride solutions (potential 2.5V Saturated AgCl/Cl, temperature 25 °C)

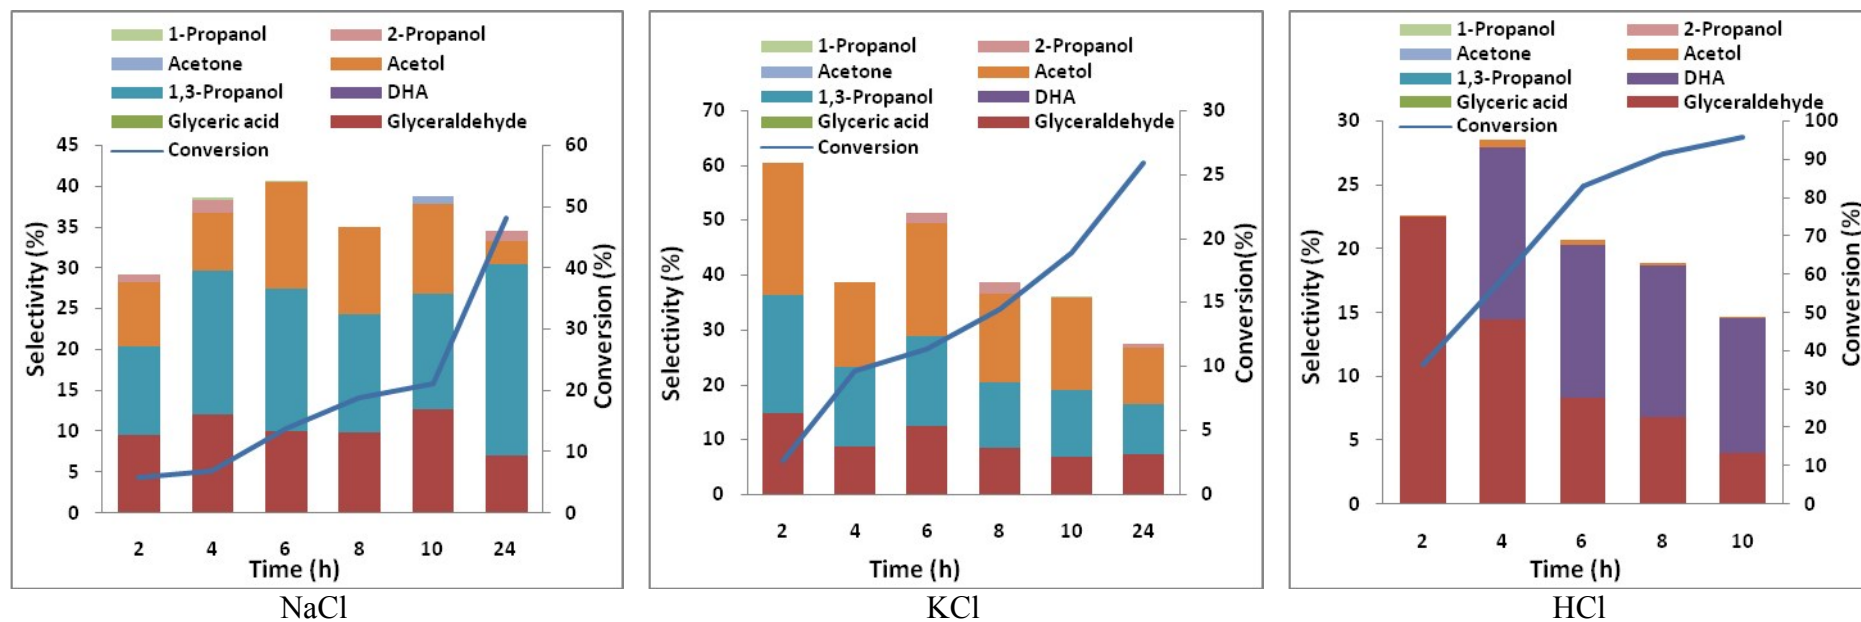

Figure S5: Conversion and selectivity of oxidation of 0.25M Glycerol in a undivided cell using Pb working electrode and Pt counter electrode in using 0.5M chloride solutions (potential -1.8V Saturated AgCl/Cl, temperature 25 °C)

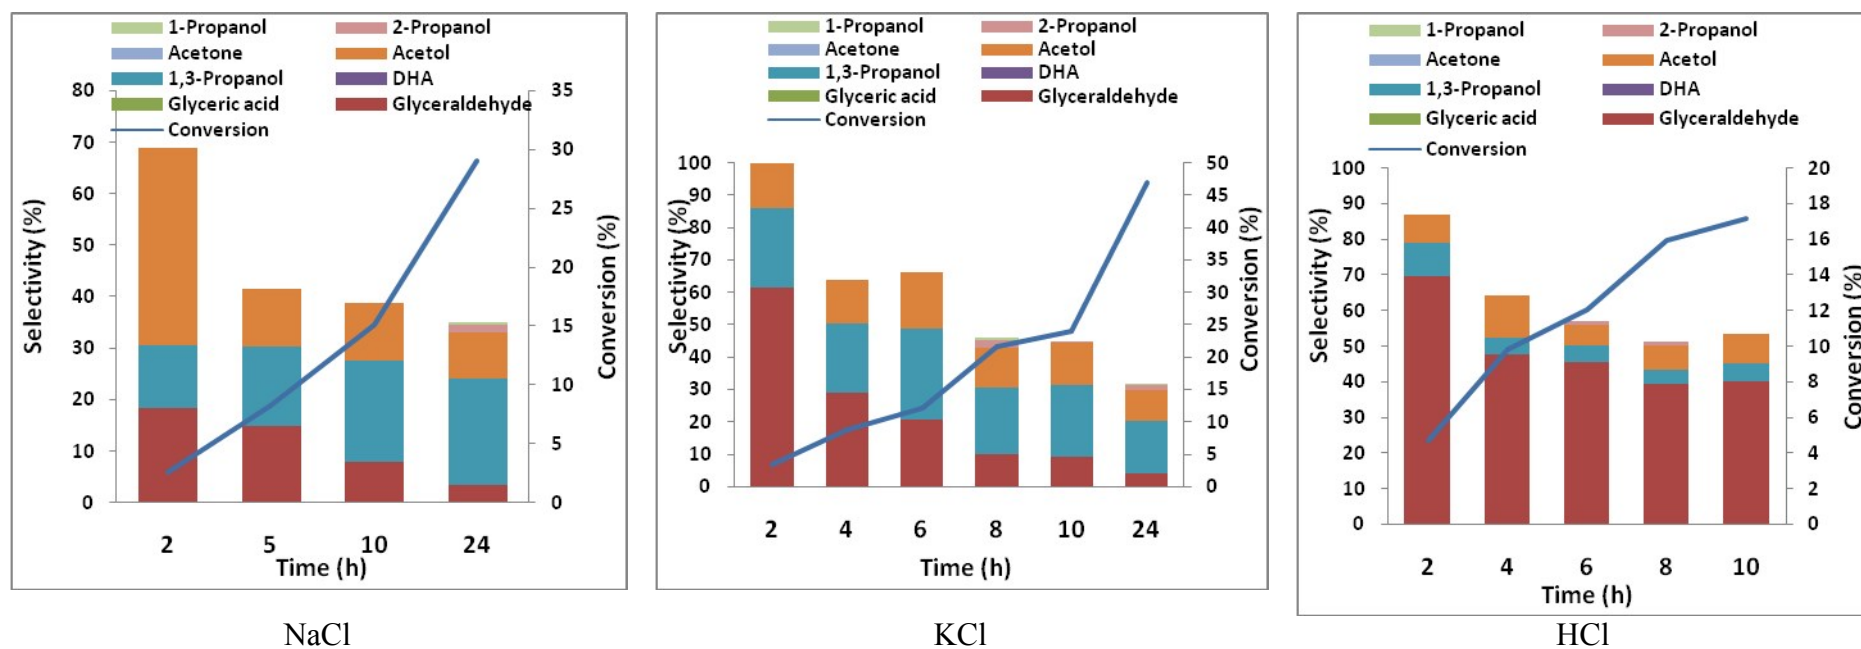

Figure S6: Conversion and selectivity of oxidation of 0.25M Glycerol in a undivided cell using Zn working electrode and Pt counter electrode in using 0.5M chloride solutions (potential -1.8V Saturated AgCl/Cl, temperature 25 °C)
